# Supplementary material
Source: PubMed Central journal article supplement (PMC2785202)
Supplement: supp_M109.058420_jbc.M109.058420-1.pdf [file supp_M109.058420_jbc.M109.058420-1.pdf]

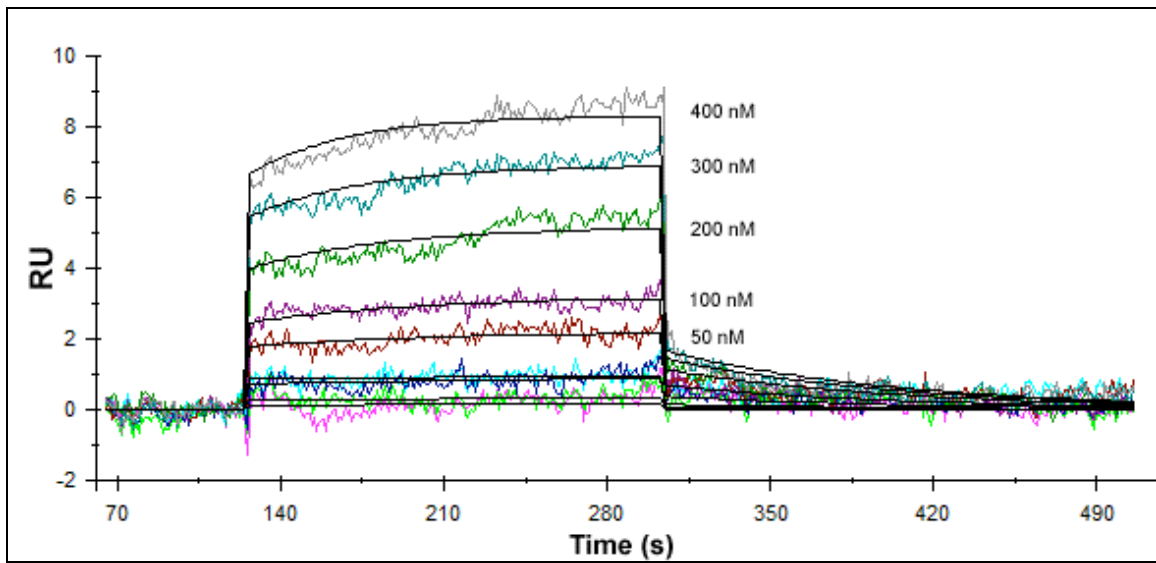

**Fig S1.** Surface plasmon resonance (SPR) analysis of NGF/SS-1 binding to TrkA-ECD. Sensorgrams depict the change in Response Units (RU) with time as 2.5 to 400 nM NGF/SS-1 flows over ~250 RU of TrkA ECD immobilized on a CM4 chip. The 1:1 Langmuir curve fitting was used for obtaining the  $K_d$  values shown in Table 1.
